# Supplementary material for: Dual-Wavelength Fluorescence Polarization Immunoassay for Simultaneous Detection of Sulfonamides and Antibacterial Synergists in Milk
Source: MDPI journal article supplement (doi:10.3390/bios12111053), 2022-11-21
Supplement: s1 [file s1]

Supporting information for

**Dual-wavelength fluorescence polarization immunoassay for  
simultaneous detection of sulfonamides and antibacterial  
synergists in milk**

Changfei Duan <sup>1</sup>, Yingjie Zhang <sup>1</sup>, Peipei Li <sup>1</sup>, Qiang Li <sup>1</sup>, Wenbo Yu <sup>1</sup>, Kai Wen  
<sup>1</sup>, Sergei A. Eremin <sup>2</sup>, Jianzhong Shen <sup>1</sup>, Xuezhi Yu <sup>1,\*</sup> and Zhanhui Wang <sup>1</sup>

<sup>1</sup> *Beijing Key Laboratory of Detection Technology for Animal-Derived Food, Beijing  
Laboratory for Food Quality and Safety, College of Veterinary Medicine, China  
Agricultural University, 100193 Beijing, People's Republic of China*

<sup>2</sup> *Department of Chemistry, M.V. Lomonosov Moscow State University, Moscow  
119991, Russia*

*\*Corresponding author: Xuezhi Yu*

*E-mail: yu51422396@126.com*

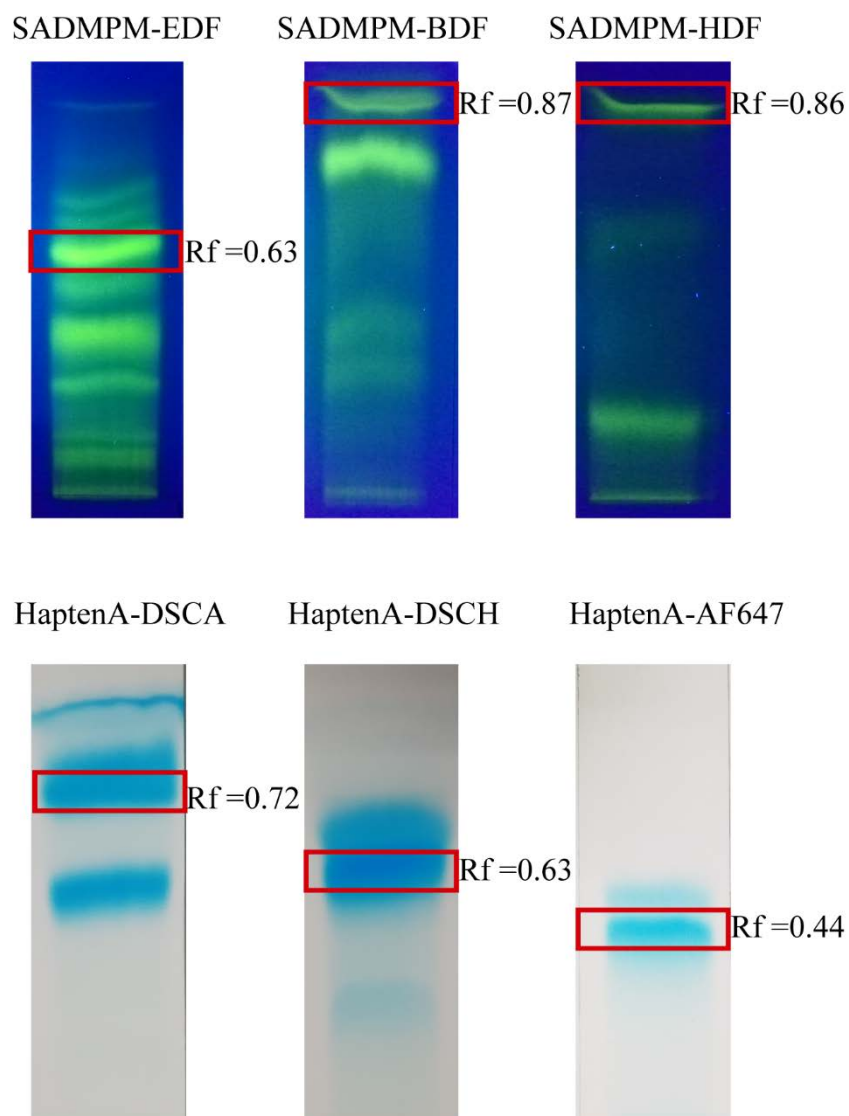

**Figure S1.** The TLC purification of the tracers. The target band is enclosed in a red box.

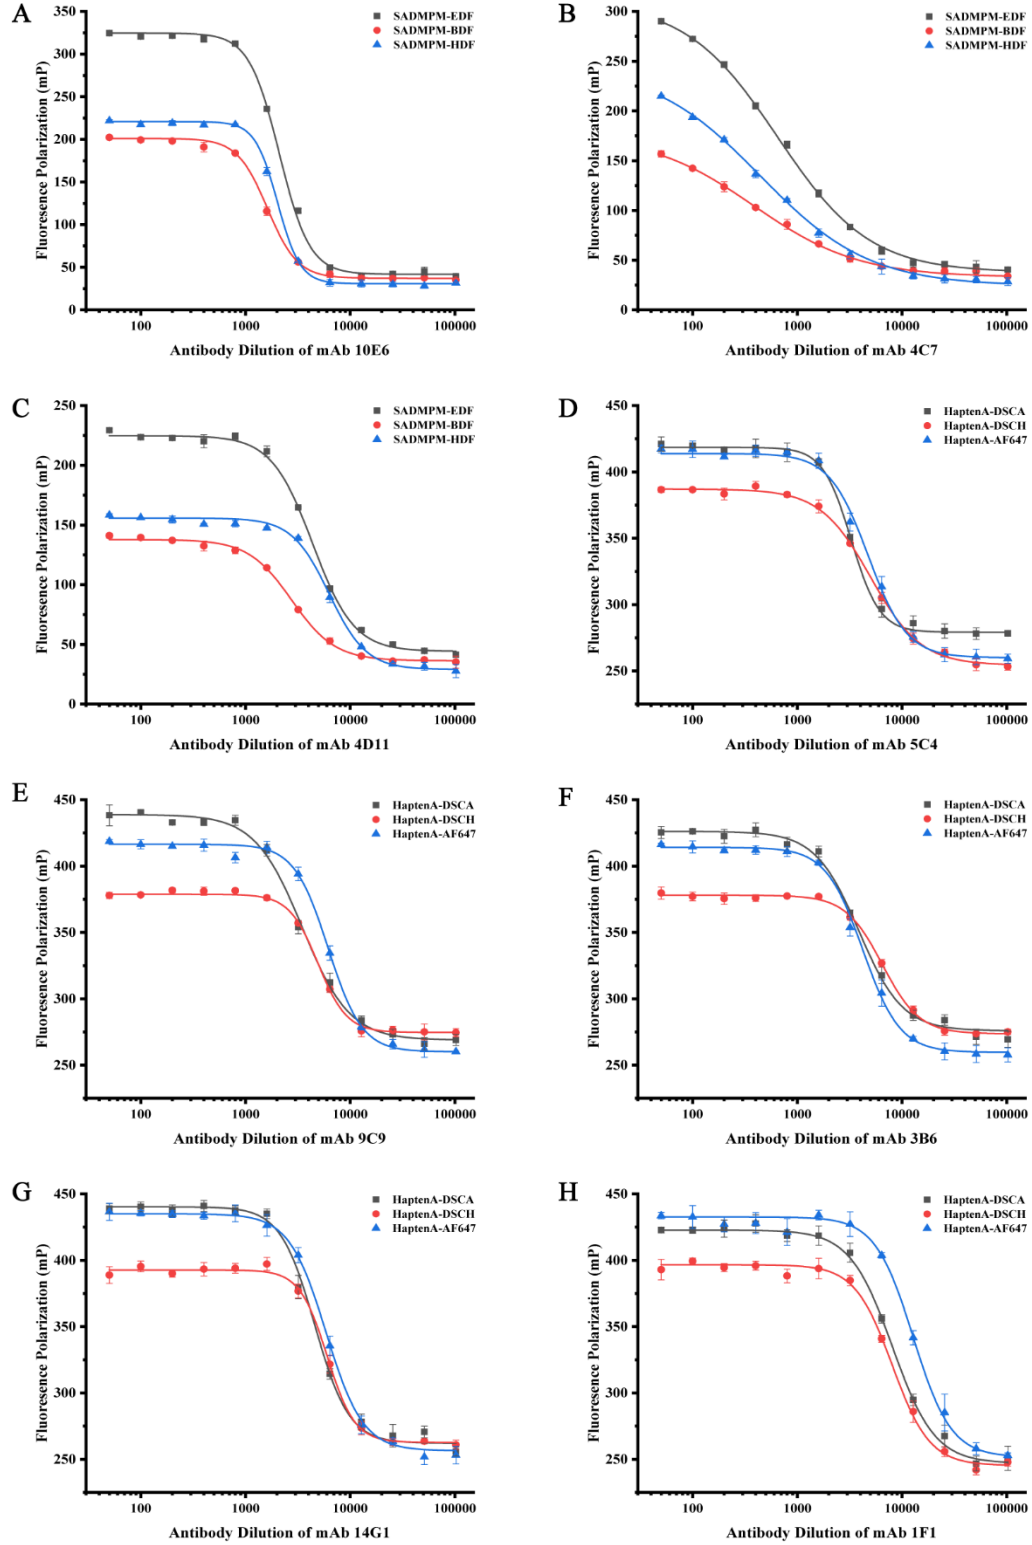

**Figure S2.** Antibody dilution curves of tracers (n = 3). (A) mAb 10E6 with SADMPM-EDF, SADMPM-BDF, and SADMPM-HDF. (B) mAb 4C7 with SADMPM-EDF, SADMPM-BDF, and SADMPM-HDF. (C) mAb 4D11 with

SADMPPM-EDF, SADMPPM-BDF, and SADMPPM-HDF. (D) mAb 5C4 with HaptenA-DSCA, HaptenA-DSCH, and HaptenA-AF647. (E) mAb 9C9 with HaptenA-DSCA, HaptenA-DSCH, and HaptenA-AF647. (F) mAb 3B6 with HaptenA-DSCA, HaptenA-DSCH, and HaptenA-AF647. (G) mAb 14G1 with HaptenA-DSCA, HaptenA-DSCH, and HaptenA-AF647. (H) mAb 1F1 with HaptenA-DSCA, HaptenA-DSCH, and HaptenA-AF647.

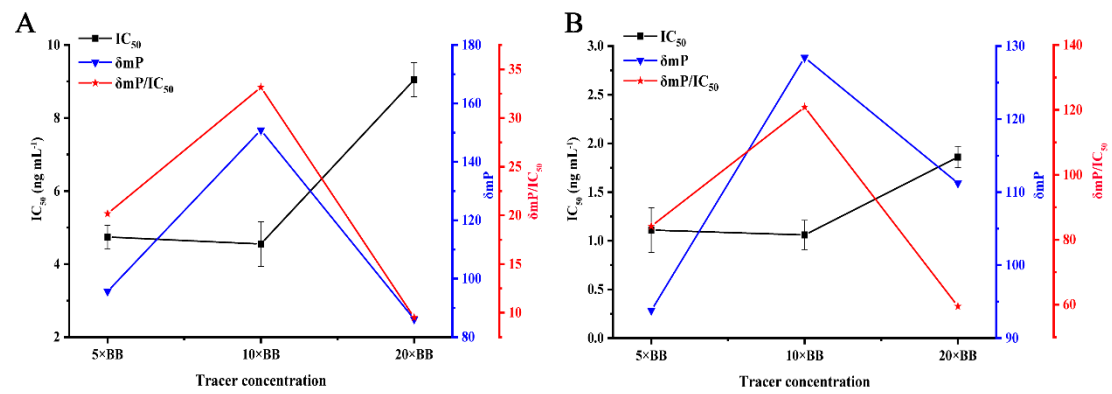

**Figure S3.** The effect of the tracer concentration for SMZ (A) and TMP (B).

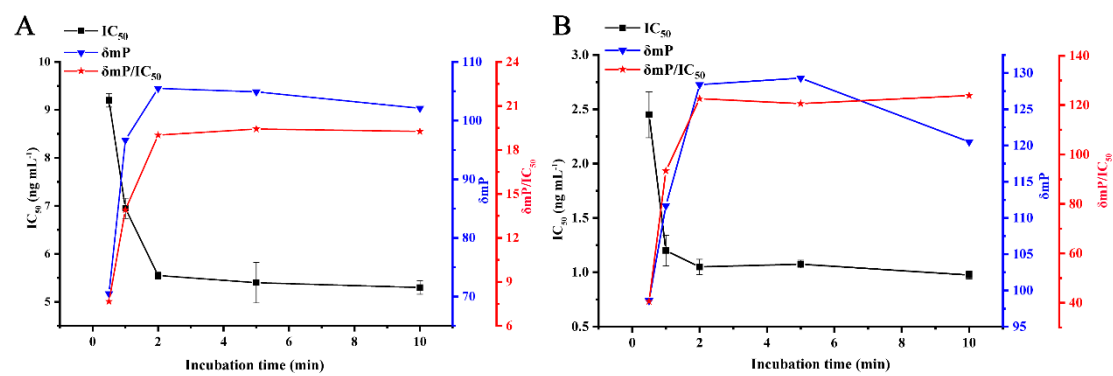

**Figure S4.** Influence of incubation time on DWFPIA for SMZ (A) and TMP (B)

**Table S1.** R<sub>f</sub> values of the short-wavelength tracers of SAs.

| Names      | Volume (μl) | Developing solvent                                          | R <sub>f</sub> values |
|------------|-------------|-------------------------------------------------------------|-----------------------|
| SADMPM-EDF | 20          | trichloromethane/methanol/acetic acid<br>(6:1:0.07, v/v/v)  | 0.63                  |
| SADMPM-BDF | 20          | trichloromethane/methanol/ acetic acid<br>(6:1:0.07, v/v/v) | 0.87                  |
| SADMPM-HDF | 20          | trichloromethane/methanol/ acetic acid<br>(6:1:0.07, v/v/v) | 0.86                  |

**Table S2.** R<sub>f</sub> values the long-wavelength tracers of ASGs.

| Names         | Volume(μl) | Developing solvent                                          | R <sub>f</sub> values |
|---------------|------------|-------------------------------------------------------------|-----------------------|
| HaptenA-DSCA  | 20         | trichloromethane/methanol/ acetic acid<br>(6:1:0.07, v/v/v) | 0.72                  |
| HaptenA-DSCH  | 20         | trichloromethane/methanol/ acetic acid<br>(6:1:0.07, v/v/v) | 0.63                  |
| HaptenA-AF647 | 20         | trichloromethane/methanol/ acetic acid<br>(6:1:0.07, v/v/v) | 0.44                  |



**Table S3.** The IC<sub>50</sub> values and CRs in DWFPIA of SAs

| Name   | IC <sub>50</sub> (ng/mL) | CRs (%) |
|--------|--------------------------|---------|
| SMZ    | 4.7                      | 100     |
| SCP    | 69.2                     | 6.8     |
| SPA    | 2.5                      | 191.7   |
| SIZ    | 1.4                      | 328.6   |
| STZ    | 1.7                      | 270.6   |
| SMD    | 4.0                      | 117.9   |
| SPY    | 8.4                      | 56.1    |
| SMM    | 5.7                      | 82.1    |
| SQX    | 2.9                      | 164.3   |
| SDZ/SD | 3.3                      | 143.8   |
| SMX    | 3.7                      | 127.8   |
| SDM    | 6.2                      | 75.4    |
| SMP    | 4.3                      | 109.5   |
| SCY    | 5.1                      | 92.0    |
| SMR    | 2.5                      | 191.7   |
| SDM'   | 32.6                     | 14.4    |
| SXL    | 3.8                      | 124.3   |
| SMT    | 2.1                      | 219.0   |
| SBA    | 3.4                      | 139.4   |
| SIM    | 6.1                      | 76.7    |
| SEP    | 19.2                     | 24.5    |
| SBM    | 6.2                      | 75.4    |
| SLE    | 3.1                      | 153.3   |

**Table S4.** The IC<sub>50</sub> values and CRs in DWFPIA of ASGs

| Name | IC <sub>50</sub> (ng/mL) | CRs (%) |
|------|--------------------------|---------|
| TMP  | 1.1                      | 100     |
| OMP  | 1.8                      | 61.1    |
| BQP  | 0.9                      | 122.2   |
| DVD  | 0.8                      | 137.5   |
| BOP  | 1.2                      | 91.7    |

**Table S5.** Comparisons with reported simultaneous analytical methods for SAs and ASGs.

| methods          | analytes number | assay time (from added samples) | LOD ( $\mu\text{g L}^{-1}$ or $\mu\text{g kg}^{-1}$ ) | references |
|------------------|-----------------|---------------------------------|-------------------------------------------------------|------------|
| GC-MS            | 1 SAs           | — <sup>a</sup>                  | SMZ 1140 <sup>b</sup>                                 | [11]       |
|                  | 1 ASGs          |                                 | TMP 860 <sup>b</sup>                                  |            |
| MIP-SBSE-HPLC    | 3 SAs           | — <sup>a</sup>                  | SMZ 4.8                                               | [12]       |
|                  | 1 ASGs          |                                 | TMP 1.6                                               |            |
| UHPLC-QE HF HRMS | 27SAs           | 10 min                          | SMZ 0.01                                              | [49]       |
|                  | 6ASGs           |                                 | TMP 0.02                                              |            |
| SPE-HPLC         | 3 SAs           | 20 min                          | SMZ 10                                                | [50]       |
|                  | 1 ASGs          |                                 | TMP 10                                                |            |
| DWFPIA           | 23 SAs          | 2 min                           | SMZ 3.3                                               | this study |
|                  | 5 ASGs          |                                 | TMP 0.7                                               |            |

<sup>a</sup> No report

<sup>b</sup> positive chemical ionization (selected ion monitoring) method detection limits

Gas chromatography-mass spectral (GC-MS)

Molecularly imprinted polymer-coated stir bar sorptive extraction coupled with high performance liquid chromatography (MIP-SBSE-HPLC)

Ultra-high performance liquid chromatography coupled to quadrupole-high-field orbitrap high resolution MS (UHPLC-QE HF HRMS)

Solid phase extraction high-performance liquid chromatography (SPE-HPLC)
